# Supplementary material
Source: publisher figshare collection journal article supplement (https://gsajournals.figshare.com/articles/dataset/_/13206221)
Supplement: Supplementary file 1 [file 1]

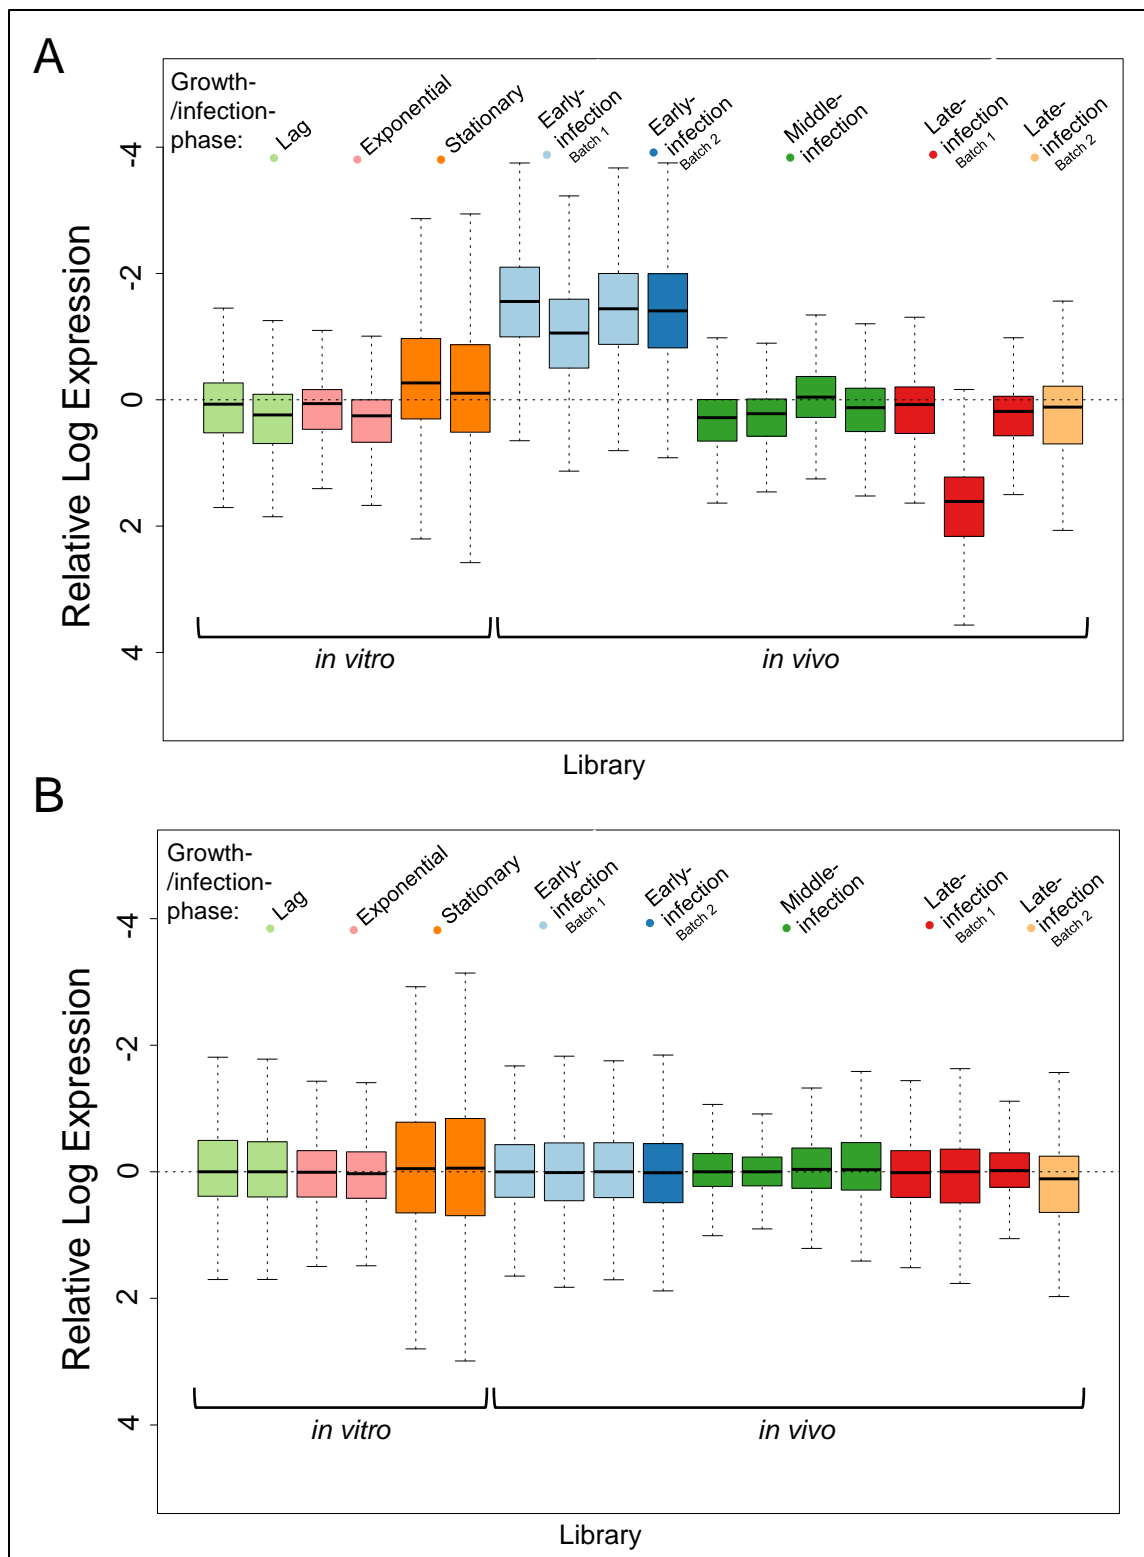

Figure S4. Relative log expression of *in vivo* and *in vitro* libraries represented as median boxplots. A) unnormalized and B) upper-quartile normalized. Individual collection batches are noted where applicable.
