# Supplementary material
Source: publisher figshare collection journal article supplement (https://gsajournals.figshare.com/articles/dataset/_/13206221)
Supplement: Supplementary file 2 [file 1]

Table S7: Mean percentage of trimmed paired-end reads aligning to *Yersinia entomophaga* MH96 reference genome, including protein-coding, tRNA and non-coding regions (*in vivo*: n = 4, *in vitro*: n = 2).

| Infection-stage / growth-phase | Total alignments | Protein coding region | Anti-sense protein coding region | tRNA | Non-annotated regions |
|--------------------------------|------------------|-----------------------|----------------------------------|------|-----------------------|
| <i>In vivo</i>                 |                  |                       |                                  |      |                       |
| Early infection                | 9 %              | 77 %                  | 2 %                              | 1 %  | 22 %                  |
| Middle infection               | 58 %             | 74 %                  | 2 %                              | 1 %  | 24 %                  |
| Late infection                 | 59 %             | 75 %                  | 1 %                              | 0 %  | 24 %                  |
| <i>In vitro</i>                |                  |                       |                                  |      |                       |
| Lag                            | 93 %             | 84 %                  | 2 %                              | 1 %  | 14 %                  |
| Exponential                    | 84 %             | 83 %                  | 1 %                              | 1 %  | 15 %                  |
| Stationary                     | 93 %             | 85 %                  | 1 %                              | 0 %  | 14 %                  |
