# Supplementary material
Source: publisher figshare collection journal article supplement (https://gsajournals.figshare.com/articles/dataset/_/13206221)
Supplement: Supplementary file 3 [file 1]

Table S2: Adapter and barcode sequences used to trim all *in vivo* samples and *in vitro* samples 'F22-1' and 'F22-2' (exponential growth phase).

```

>Illumina_D5_adapter_i5a
ATGATACGGCGACCACCGAGATCTACAC
>Illumina_D5_adapter_i5b
ACACTCTTTCCCTACACGACGCTCTTCCGATCT
>Illumina_D5_adapter_i7a
GATCGGAAGAGCACACGTCTGAACTCCAGTCAC
>Illumina_D5_adapter_i7b
ATCTCGTATGCCGTCTTCTGCTTG
>Truseq_Universal_Adapter
AATGATACGGCGACCACCGAGATCTACACTCTTTCCCTACACGACGCTCTTCCGATCT
>Truseq_Adapter_1a
GATCGGAAGAGCACACGTCTGAACTCCAGTCAC
>Truseq_Adapter_1b
ATCTCGTATGCCGTCTTCTGCTTG
>Illumina_D5_adapter_i5a Reversed:
GTGTAGATCTCGGTGGTCGCCGTATCAT
>Illumina_D5_adapter_i5b Reversed:
AGATCGGAAGAGCGTCGTGTAGGGAAAGAGTGT
>Illumina_D5_adapter_i7a Reversed:
GTGACTGGAGTTCAGACGTGTGCTCTTCCGATC
>Illumina_D5_adapter_i7b Reversed:
CAAGCAGAAGACGGCATACGAGAT
>Truseq_Universal_Adapter Reversed:
AGATCGGAAGAGCGTCGTGTAGGGAAAGAGTGTAGATCTCGGTGGTCGCCGTATCATT
>Truseq_Adapter_1a Reversed:
GTGACTGGAGTTCAGACGTGTGCTCTTCCGATC
>Truseq_Adapter_1b Reversed:
CAAGCAGAAGACGGCATACGAGAT
>TruSeq_Universal_Adapter
AATGATACGGCGACCACCGAGATCTACACTCTTTCCCTACACGACGCTCTTCCGATCT
>O15-1_with_barcode
GATCGGAAGAGCACACGTCTGAACTCCAGTCACATCACGATCTCGTATGCCGTCTTCTGCTTG
>O15-2_with_barcode
GATCGGAAGAGCACACGTCTGAACTCCAGTCACCGATGTATCTCGTATGCCGTCTTCTGCTTG
>O15-3_with_barcode
GATCGGAAGAGCACACGTCTGAACTCCAGTCACTTAGGCATCTCGTATGCCGTCTTCTGCTTG
>O19-1_with_barcode
GATCGGAAGAGCACACGTCTGAACTCCAGTCACTGACCAATCTCGTATGCCGTCTTCTGCTTG
>O18-3_with_barcode
GATCGGAAGAGCACACGTCTGAACTCCAGTCACACAGTGATCTCGTATGCCGTCTTCTGCTTG
>O18-4_with_barcode
GATCGGAAGAGCACACGTCTGAACTCCAGTCACGCCAATATCTCGTATGCCGTCTTCTGCTTG
>O18-7_with_barcode
GATCGGAAGAGCACACGTCTGAACTCCAGTCACCAGATCATCTCGTATGCCGTCTTCTGCTTG
>O18-8_with_barcode

```

GATCGGAAGAGCACACGTCTGAACTCCAGTCACACTTGAATCTCGTATGCCGTCTTCTGCTTG  
>O20-1\_with\_barcode  
GATCGGAAGAGCACACGTCTGAACTCCAGTCACGATCAGATCTCGTATGCCGTCTTCTGCTTG  
>O20-3B\_with\_barcode  
GATCGGAAGAGCACACGTCTGAACTCCAGTCACTAGCTTATCTCGTATGCCGTCTTCTGCTTG  
>O20-4\_with\_barcode  
GATCGGAAGAGCACACGTCTGAACTCCAGTCACGGCTACATCTCGTATGCCGTCTTCTGCTTG  
>D4-2\_with\_barcode  
GATCGGAAGAGCACACGTCTGAACTCCAGTCACGGCTACATCTCGTATGCCGTCTTCTGCTTG  
>F22-1\_with\_barcode  
GATCGGAAGAGCACACGTCTGAACTCCAGTCACGATCAGATCTCGTATGCCGTCTTCTGCTTG  
>F22-2\_with\_barcode  
GATCGGAAGAGCACACGTCTGAACTCCAGTCACTAGCTTATCTCGTATGCCGTCTTCTGCTTG  
>J24-5\_with\_barcode  
GATCGGAAGAGCACACGTCTGAACTCCAGTCACATCAGATCTCGTATGCCGTCTTCTGCTTG  
>J24-6\_with\_barcode  
GATCGGAAGAGCACACGTCTGAACTCCAGTCACCGATGTATCTCGTATGCCGTCTTCTGCTTG  
>J24-7\_with\_barcode  
GATCGGAAGAGCACACGTCTGAACTCCAGTCACTTAGGCATCTCGTATGCCGTCTTCTGCTTG  
>J24-8\_with\_barcode  
GATCGGAAGAGCACACGTCTGAACTCCAGTCACTGACCAATCTCGTATGCCGTCTTCTGCTTG  
>TruSeq\_Universal\_Adapter\_RC  
AGATCGGAAGAGCGTTCGTGTAGGGAAAGAGTGTAGATCTCGGTGGTCGCCGTATCATT  
>O15-1\_with\_barcode\_RC  
CAAGCAGAAGACGGCATAACGAGATCGTGATGTGACTGGAGTTCAGACGTGTGCTCTTCCGATC  
>O15-2\_with\_barcode\_RC  
CAAGCAGAAGACGGCATAACGAGATACATCGGTGACTGGAGTTCAGACGTGTGCTCTTCCGATC  
>O15-3\_with\_barcode\_RC  
CAAGCAGAAGACGGCATAACGAGATGCCTAAGTACTGGAGTTCAGACGTGTGCTCTTCCGATC  
>O19-1\_with\_barcode\_RC  
CAAGCAGAAGACGGCATAACGAGATTGGTCAGTGACTGGAGTTCAGACGTGTGCTCTTCCGATC  
>O18-3\_with\_barcode\_RC  
CAAGCAGAAGACGGCATAACGAGATCACTGTGTGACTGGAGTTCAGACGTGTGCTCTTCCGATC  
>O18-4\_with\_barcode\_RC  
CAAGCAGAAGACGGCATAACGAGATATTGGCGTGACTGGAGTTCAGACGTGTGCTCTTCCGATC  
>O18-7\_with\_barcode\_RC  
CAAGCAGAAGACGGCATAACGAGATGATCTGGTGACTGGAGTTCAGACGTGTGCTCTTCCGATC  
>O18-8\_with\_barcode\_RC  
CAAGCAGAAGACGGCATAACGAGATTCAAGTGTGACTGGAGTTCAGACGTGTGCTCTTCCGATC  
>O20-1\_with\_barcode\_RC  
CAAGCAGAAGACGGCATAACGAGATCTGATCGTGACTGGAGTTCAGACGTGTGCTCTTCCGATC  
>O20-3B\_with\_barcode\_RC  
CAAGCAGAAGACGGCATAACGAGATAAGCTAGTGACTGGAGTTCAGACGTGTGCTCTTCCGATC  
>O20-4\_with\_barcode\_RC  
CAAGCAGAAGACGGCATAACGAGATGTAGCCGTGACTGGAGTTCAGACGTGTGCTCTTCCGATC  
>D4-2\_with\_barcode\_RC  
CAAGCAGAAGACGGCATAACGAGATGTAGCCGTGACTGGAGTTCAGACGTGTGCTCTTCCGATC

```
>F22-1_with_barcode_RC
CAAGCAGAAGACGGCATAACGAGATCTGATCGTGACTGGAGTTCAGACGTGTGCTCTTCCGATC
>F22-2_with_barcode_RC
CAAGCAGAAGACGGCATAACGAGATAAGCTAGTGACTGGAGTTCAGACGTGTGCTCTTCCGATC
>J24-5_with_barcode_RC
CAAGCAGAAGACGGCATAACGAGATCGTGATGTGACTGGAGTTCAGACGTGTGCTCTTCCGATC
>J24-6_with_barcode_RC
CAAGCAGAAGACGGCATAACGAGATACATCGGTGACTGGAGTTCAGACGTGTGCTCTTCCGATC
>J24-7_with_barcode_RC
CAAGCAGAAGACGGCATAACGAGATGCCTAAGTGACTGGAGTTCAGACGTGTGCTCTTCCGATC
>J24-8_with_barcode_RC
CAAGCAGAAGACGGCATAACGAGATTGGTCAGTGACTGGAGTTCAGACGTGTGCTCTTCCGATC
```
