# Supplementary material
Source: publisher figshare collection journal article supplement (https://gsajournals.figshare.com/articles/dataset/_/13206221)
Supplement: Supplementary file 4 [file 1]

Table S8: Location of predicted genomic islands in the genome of *Y. entomophaga* MH96 based on Island Viewer 4 analysis.

| Island | Start     | Stop      |
|--------|-----------|-----------|
| Is.1   | 4,245,874 | 43,205    |
| Is.2   | 63,587    | 68,974    |
| Is.3   | 190,789   | 198,981   |
| Is.4   | 642,845   | 691,291   |
| Is.5   | 749,459   | 763,698   |
| Is.6   | 840,932   | 892,566   |
| Is.7   | 911,590   | 931,192   |
| Is.8   | 1,042,716 | 1,047,262 |
| Is.9   | 1,161,921 | 1,166,559 |
| Is.10  | 1,323,793 | 1,330,066 |
| Is.11  | 1,5726,53 | 1,602,200 |
| Is.12  | 1,693,457 | 1,718,980 |
| Is.13  | 2,171,815 | 2,180,723 |
| Is.14  | 2,633,449 | 2,651,765 |
| Is.15  | 3,084,579 | 3,102,232 |
| Is.16  | 3,204,015 | 3,214,229 |
| Is.17  | 3,263,328 | 3,292,504 |
| Is.18  | 3,326,808 | 3,340,556 |
| Is.19  | 3,516,027 | 3,562,485 |
| Is.20  | 3,655,950 | 3,662,717 |
| Is.21  | 3,729,760 | 3,736,838 |
