# Supplementary material
Source: publisher figshare collection journal article supplement (https://gsajournals.figshare.com/articles/dataset/_/13206221)
Supplement: Supplementary file 5 [file 1]

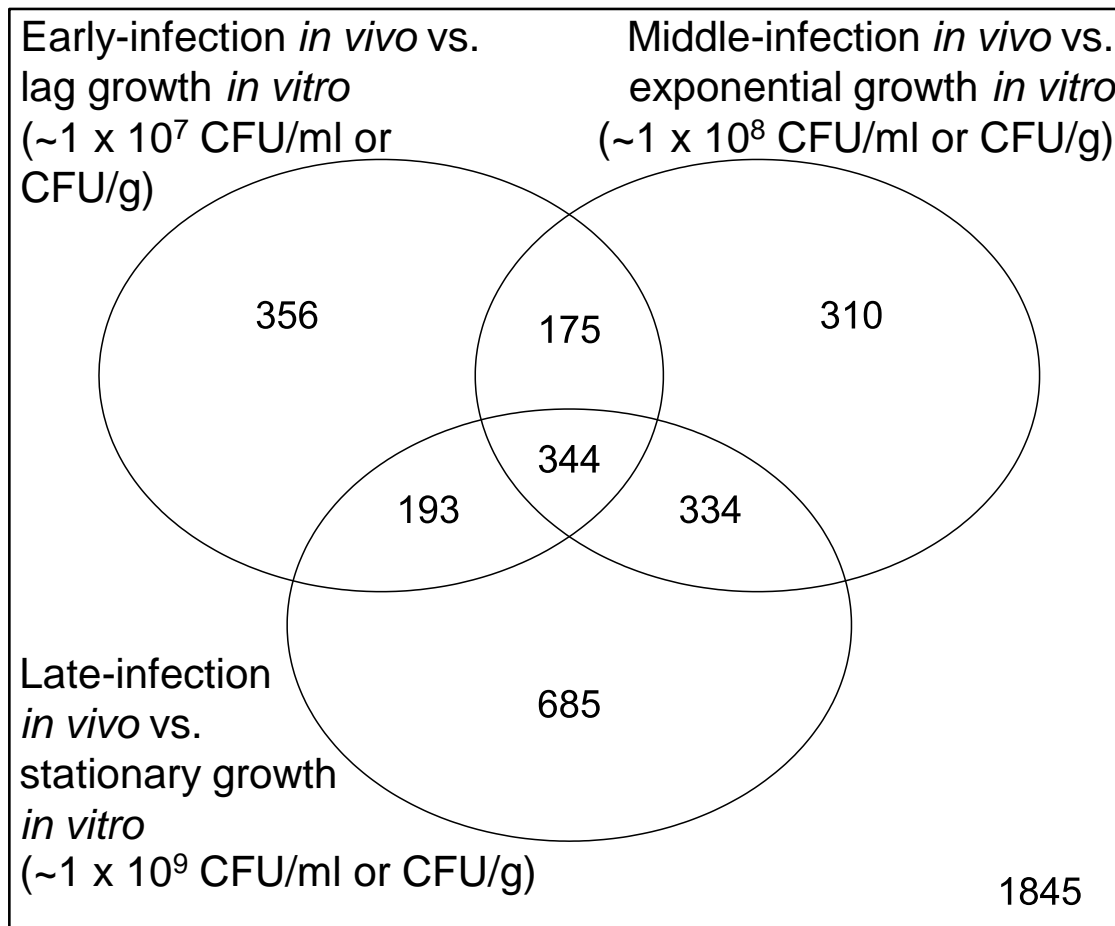

Figure S6. Differentially expressed transcripts from *in vivo* or *in vitro* libraries during early, middle and late infection and lag, exponential and stationary growth phases, respectively. Significance was multiple-test corrected (Benjamini and Yekutieli 2001) with an adjusted p-value threshold of 0.05. See supplemental Table S5 for more details on the contrasts represented in the Venn groups.
