# Supplementary material
Source: publisher figshare collection journal article supplement (https://gsajournals.figshare.com/articles/dataset/_/13206221)
Supplement: Supplementary file 6 [file 1]

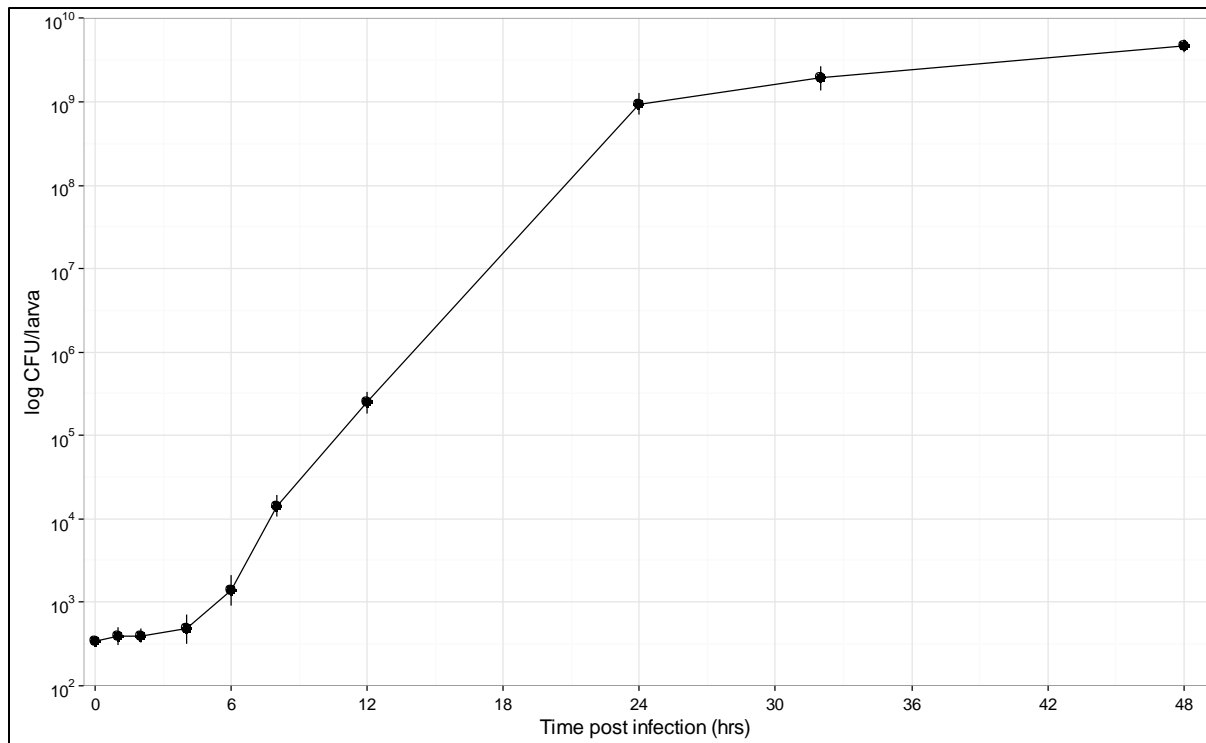

Figure S1: *In vivo* growth curve of *Yersinia entomophaga* MH96 in the hemolymph of *Galleria mellonella* at 25 °C. Larvae were injected with approximately 345 cells in 10  $\mu$ l PBS (time-point 0) and CFU/larva were enumerated from 3 larvae per timepoint at 1, 2, 4, 6, 8, 12, 24, 32 and 48 hours post-infection. Points represent mean cell density and vertical bars represent standard error.
