# Supplementary material
Source: publisher figshare collection journal article supplement (https://gsajournals.figshare.com/articles/dataset/_/13206221)
Supplement: Supplementary file 7 [file 1]

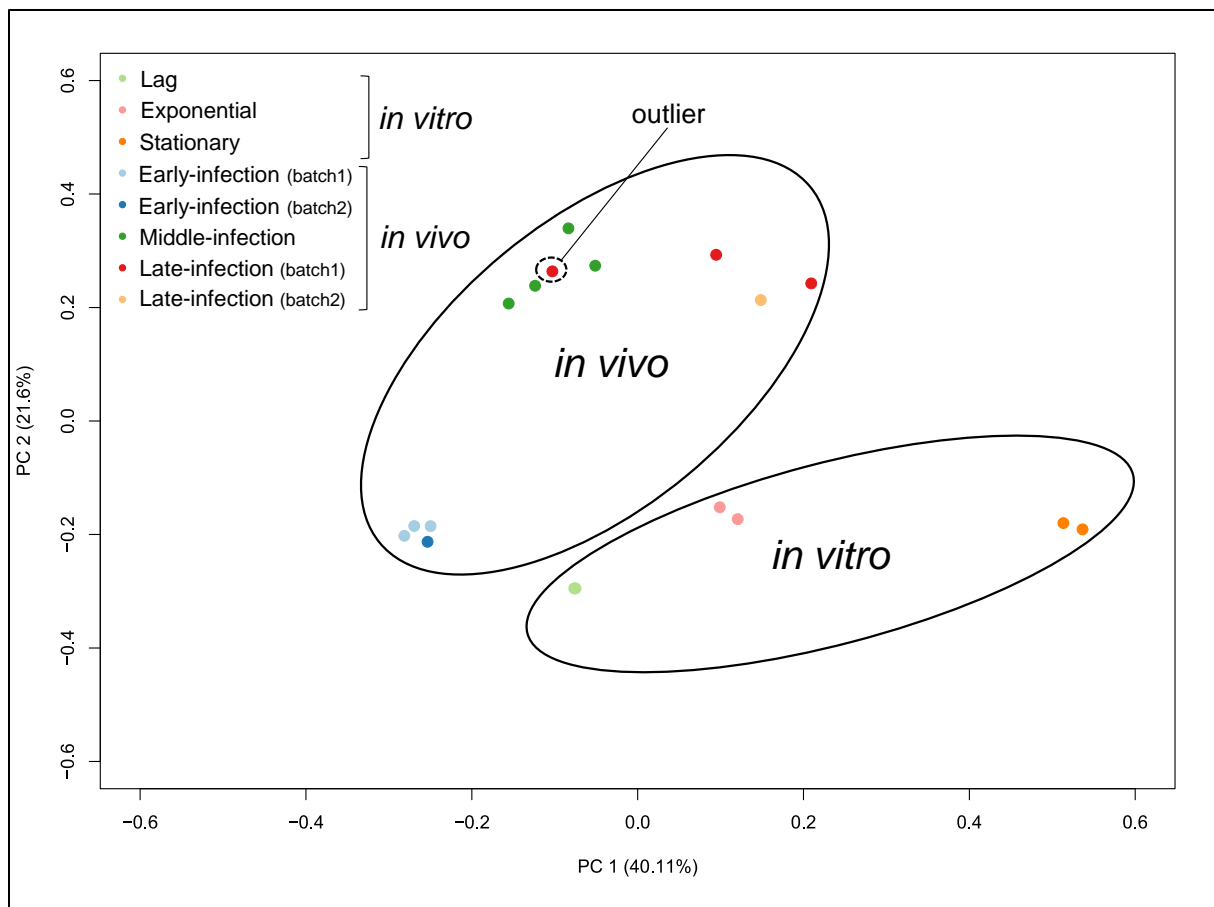

Figure S5. Principle component analysis of *in vivo* and *in vitro* library upper quartile normalized count data. Outlier late infection *in vivo* sample is indicated and was removed from subsequent analysis.
