# Supplementary material
Source: publisher figshare collection journal article supplement (https://gsajournals.figshare.com/articles/dataset/_/13206221)
Supplement: Supplementary file 8 [file 1]

Table S3: Adapter and barcode sequences used to trim all *in vitro* samples, except 'F22-1' and 'F22-2' (see Table S2).

```
>E1
TCGTCAAGTTACTCGC
>E3
CGCCGGTCTGATCTCC
>H1
TTTGACACCCTAGCGT
>H3
ACACTGTGGGCTCGGA
>MF
AGCTCACGACGCTCAG
>MG
GAGAGGGACGAGCGAA
>E1_Reversed
GCGAGTAACTTGACGA
>E3_Reversed
GGAGATCAGACCGGCG
>H1_Reversed
ACGCTAGGGTGTCAAA
>H3_Reversed
TCCGAGCCCACAGTGT
>MF_Reversed
CTGAGCGTCGTGAGCT
>MG_Reversed
TTCGCTCGTCCCTCTC
>Illumina_ReversedD5_Reversedadapter_ReversedI5a
ATGATACGGCGACCACCGAGATCTACAC
>Illumina_ReversedD5_Reversedadapter_ReversedI5b
ACACTCTTCCCTACACGACGCTCTTCCGATCT
>Illumina_ReversedD5_Reversedadapter_ReversedI7a
GATCGGAAGAGCACACGTCTGAACTCCAGTCAC
>Illumina_ReversedD5_Reversedadapter_ReversedI7b
ATCTCGTATGCCGTCTTCTGCTTG
>Truseq_ReversedUniversal_ReversedAdapter
AATGATACGGCGACCACCGAGATCTACACTCTTCCCTACACGACGCTCTTCCGATCT
>Truseq_ReversedAdapter_ReversedI1a
GATCGGAAGAGCACACGTCTGAACTCCAGTCAC
>Truseq_ReversedAdapter_ReversedI1b
ATCTCGTATGCCGTCTTCTGCTTG
>Illumina_ReversedD5_Reversedadapter_ReversedI5a_Reversed
GTGTAGATCTCGGTGGTCGCCGTATCAT
>Illumina_ReversedD5_Reversedadapter_ReversedI5b_Reversed
AGATCGGAAGAGCGTCGTGTAGGGAAAGAGTGT
>Illumina_ReversedD5_Reversedadapter_ReversedI7a_Reversed
GTGACTGGAGTTCAGACGTGTGCTCTTCCGATC
>Illumina_ReversedD5_Reversedadapter_ReversedI7b_Reversed
```

```
CAAGCAGAAGACGGCATACGAGAT
>Truseq_ReversedUniversal_ReversedAdapter_Reversed
AGATCGGAAGAGCGTCGTGTAGGGAAAGAGTGTAGATCTCGGTGGTCGCCGTATCATT
>Truseq_ReversedAdapter_Reversed1a_Reversed
GTGACTGGAGTTCAGACGTGTGCTCTTCCGATC
>Truseq_ReversedAdapter_Reversed1b_Reversed
CAAGCAGAAGACGGCATACGAGAT
>TruSeq_ReversedUniversal_ReversedAdapter
AATGATACGGCGACCACCGAGATCTACACTCTTTCCCTACACGACGCTCTTCCGATCT
```
