# Supplementary material
Source: publisher figshare collection journal article supplement (https://gsajournals.figshare.com/articles/dataset/_/13206221)
Supplement: Supplementary file 9 [file 1]

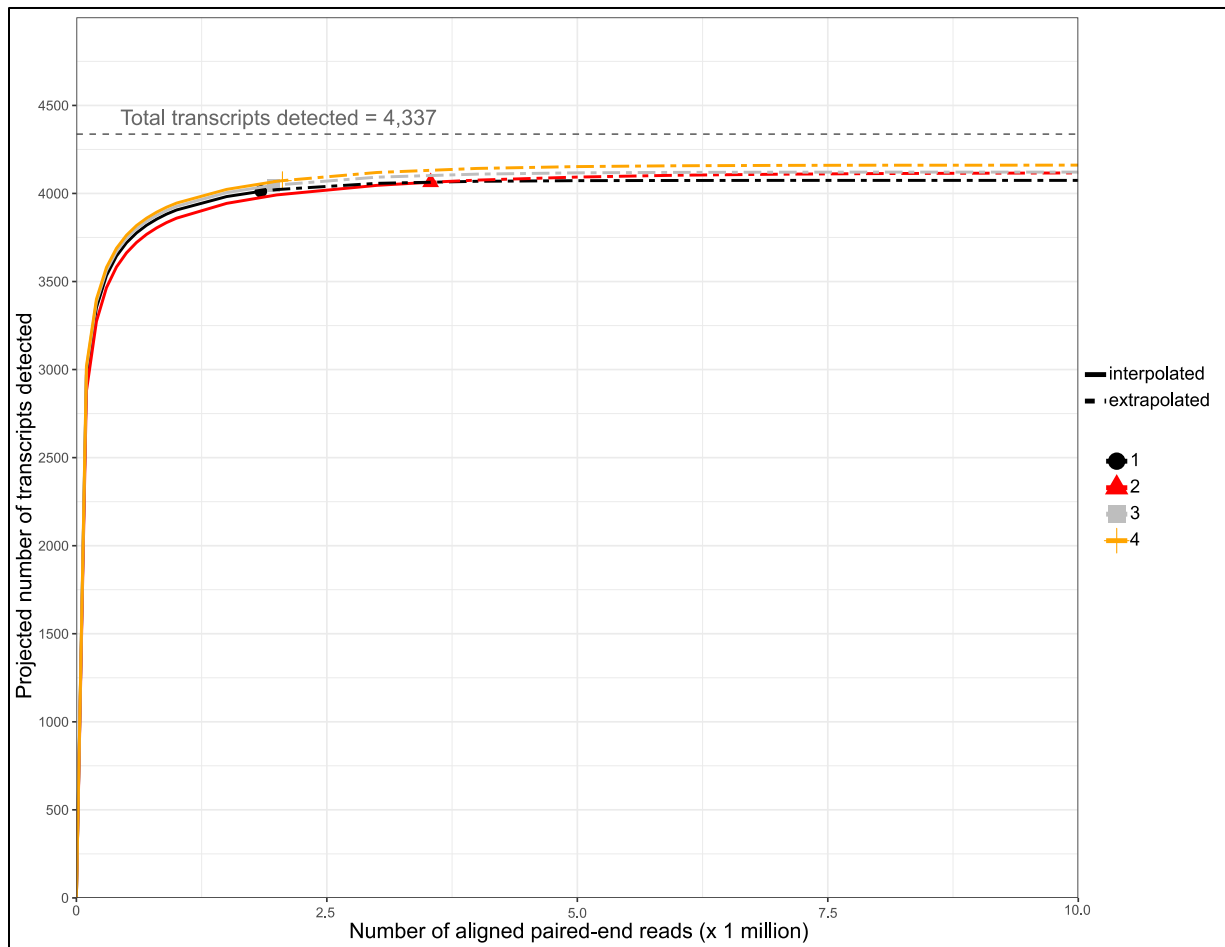

Figure S3: Predicted transcript detection based on the number of aligned paired-end reads for *in vivo* early infection libraries by rarefaction analysis. 1, 2, 3 and 4 represent individual libraries.
