# Supplementary material
Source: publisher figshare collection journal article supplement (https://gsajournals.figshare.com/articles/dataset/_/13206221)
Supplement: Supplementary file 10 [file 1]

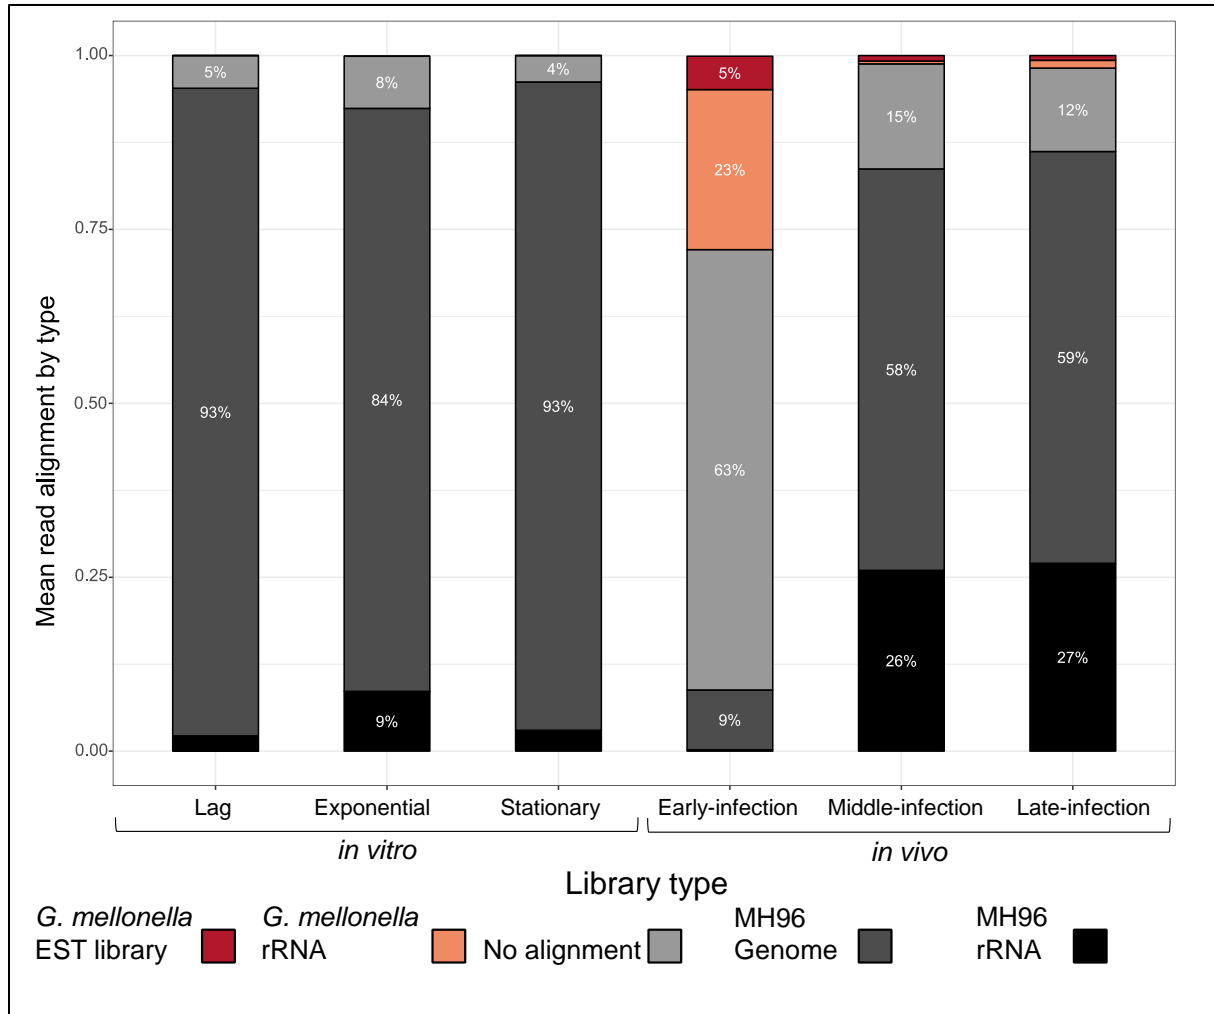

Figure S2. Mean proportion of paired-end reads attributed to host and pathogen based on average percent alignment to *Galleria mellonella* rRNA and EST sequence or *Yersinia entomophaga* MH96 genome or rRNA sequence (*in vivo*: n = 4, *in vitro*: n = 2). The growth phase and estimated cell number (CFU g<sup>-1</sup> and CFU ml<sup>-1</sup> for *in vivo* and *in vitro*, respectively) are provided in Table 1). Only percentages of 4 % and greater are shown.
