# Supplementary material
Source: publisher figshare collection journal article supplement (https://gsajournals.figshare.com/articles/dataset/_/13206221)
Supplement: Supplementary file 11 [file 1]

Table S1: Mean number of *Yersinia entomophaga* MH96 cells from inoculum and hours post-inoculation (hpi) of *Galleria mellonella* by intrahemocoelic injection corresponding to lag, exponential and stationary *in vivo* growth phases at 25 °C (n = 3 replicate plates). CFU = colony forming units, SEM = standard error of the mean and hpi = hours post-inoculation.

| <i>In vivo</i> infection stage | Mean inoculum cells<br>(CFU ± SEM) | hpi       |
|--------------------------------|------------------------------------|-----------|
| Early infection                | $2 \pm 0.1 \times 10^7$            | 1 ¼ - 1 ½ |
| Middle infection               | 157 ± 22                           | 18 -19    |
| Lag-infection                  | 693 ± 162                          | 26 – 30   |
