# Supplementary material
Source: publisher figshare collection journal article supplement (https://gsajournals.figshare.com/articles/dataset/_/13206221)
Supplement: Supplementary file 12 [file 1]

Table S4: Categories of virulence factors considered in this study.

| Category                                                                                                                               | Definition                                                                                          | Examples                                                                                                                                                                    |
|----------------------------------------------------------------------------------------------------------------------------------------|-----------------------------------------------------------------------------------------------------|-----------------------------------------------------------------------------------------------------------------------------------------------------------------------------|
| <i>Primary – secreted and directly act against host cells/tissues</i>                                                                  |                                                                                                     |                                                                                                                                                                             |
| Toxin                                                                                                                                  | Proteins that are secreted and directly target host cells/tissues, giving rise to pathogenesis.     | Insecticidal toxin complex, vegetative insecticidal protein or Cry toxin.                                                                                                   |
| Effector                                                                                                                               | Proteins that are translocated directly into host cells by type 3 or 6 secretion systems.           | <i>Yersinia</i> spp. Yop or <i>Salmonella</i> spp. Spa type 3 secretion system and hemolysin co-regulated protein (Hcp) or polymorphic rearrangement hot-spot (Rhs) toxins. |
| <i>Secondary – all other non-primary factors contributing to pathogenesis (i.e., gene abrogation results in attenuated virulence).</i> |                                                                                                     |                                                                                                                                                                             |
| Adherence                                                                                                                              | External structures used to attach to host cells or tissues.                                        | Fimbriae or filamentous hemagglutinins.                                                                                                                                     |
| Defense response                                                                                                                       | Factors used to detoxify against antimicrobial compounds or host-induced stress.                    | Superoxide dismutase, efflux pumps, iron-sulfur cluster.                                                                                                                    |
| Horizontal gene transfer                                                                                                               | Factors that promote lateral gene acquisitions or mobilization.                                     | Conjugative pili or integrases.                                                                                                                                             |
| Iron acquisition                                                                                                                       | Systems used by pathogenic bacteria to acquire iron in the host environment.                        | Siderophores, hemolysins and iron-specific transporters.                                                                                                                    |
| Metabolic adaptation                                                                                                                   | Enzymes and transporters involved in bioconversion of host-derived nutrients.                       | Amino acid transporters or chitinases.                                                                                                                                      |
| Mobility                                                                                                                               | Factors related to motility.                                                                        | Flagella or chemotaxis.                                                                                                                                                     |
| Outer membrane                                                                                                                         | Factors related to modification of outer membrane/capsule often used to evade host-immune response. | Lipopolysaccharide or outer membrane proteins.                                                                                                                              |
| Regulation                                                                                                                             | Regulatory factors controlling pathogenic response to host.                                         | Two-component sensors, quorum sensing or diguanylate cyclase.                                                                                                               |
| Secretion system                                                                                                                       | Multi-component systems used for translocation and secretion of toxins and effectors by bacteria.   | Type 2, 3, and 6 secretion systems.                                                                                                                                         |
| Unclassified                                                                                                                           | Factors that could not be classified specific categories listed above.                              | Non-ribosomal peptide synthetase or tellurium resistance genes.                                                                                                             |
